# Supplementary material
Source: PubMed Central journal article supplement (PMC5047072)
Supplement: supp_pp.16.00261_PP2016-00261R2_Supplemental_Figure_S2.pdf [file supp_pp.16.00261_PP2016-00261R2_Supplemental_Figure_S2.pdf]

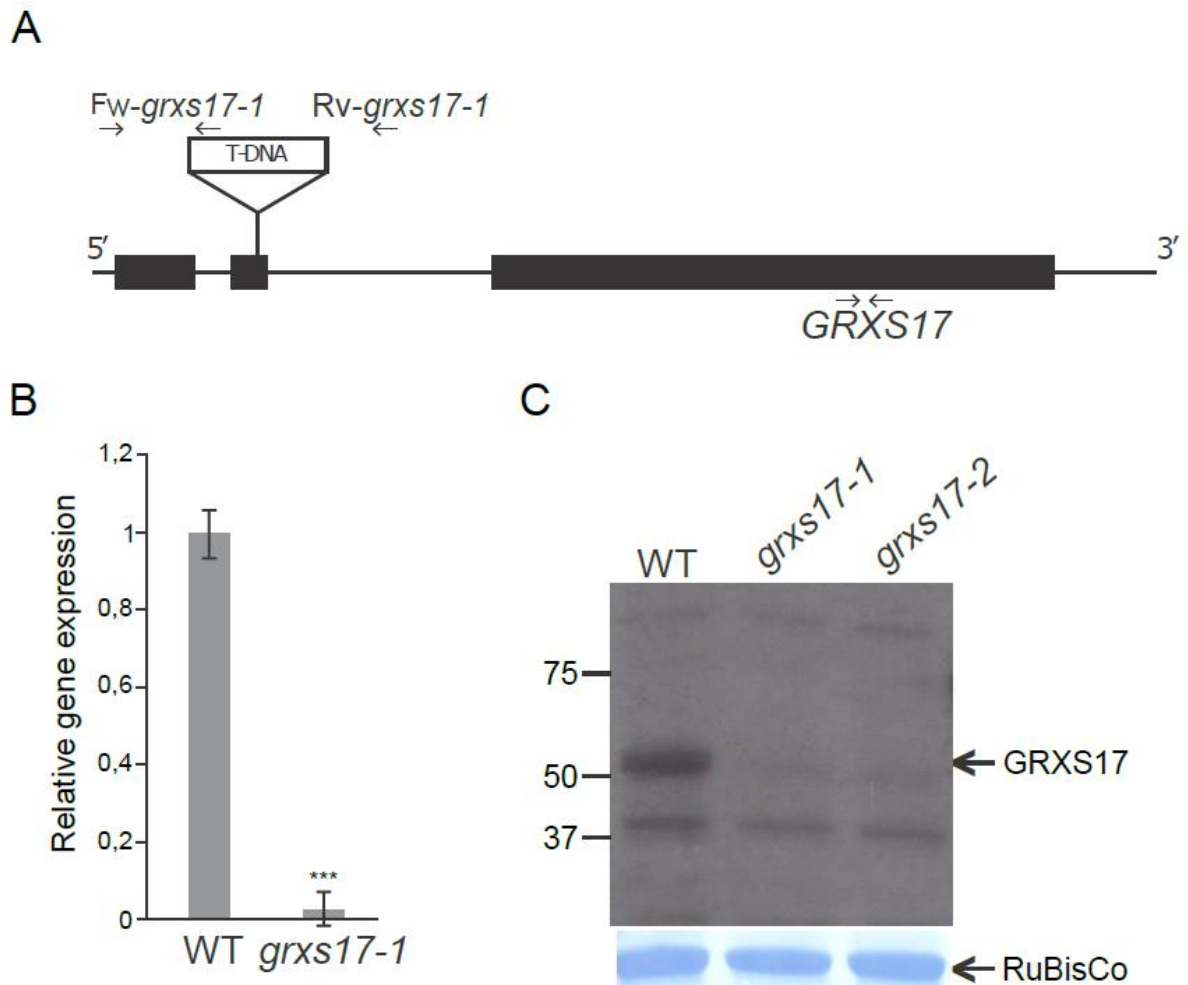

**Figure S2. Characterization of the *grxs17* mutants used in this study.** A, Schematic visualization of the *GRXS17* gene structure. Black boxes represent exons. T-DNA insertion and primers used for genotyping and qRT-PCR are indicated above or below, respectively. B, *GRXS17* gene expression analysis by qRT-PCR in *grxs17-1* seedlings. The *GRXS17* expression ratio relative to that in wild-type Col-0 seedlings is plotted (set at 1). Bars represent means  $\pm$ SE of  $n=3$  (\*\*\*,  $P<0.001$ , Student's t-test). C, Immunoblot analysis with a polyclonal anti-GRXS17 antiserum showing the absence of GRXS17 proteins in *grxs17-1* and *grxs17-2* seedlings.
