# Supplementary material
Source: PubMed Central journal article supplement (PMC5047072)
Supplement: supp_pp.16.00261_PP2016-00261R2_Supplemental_Figure_S3.pdf [file supp_pp.16.00261_PP2016-00261R2_Supplemental_Figure_S3.pdf]

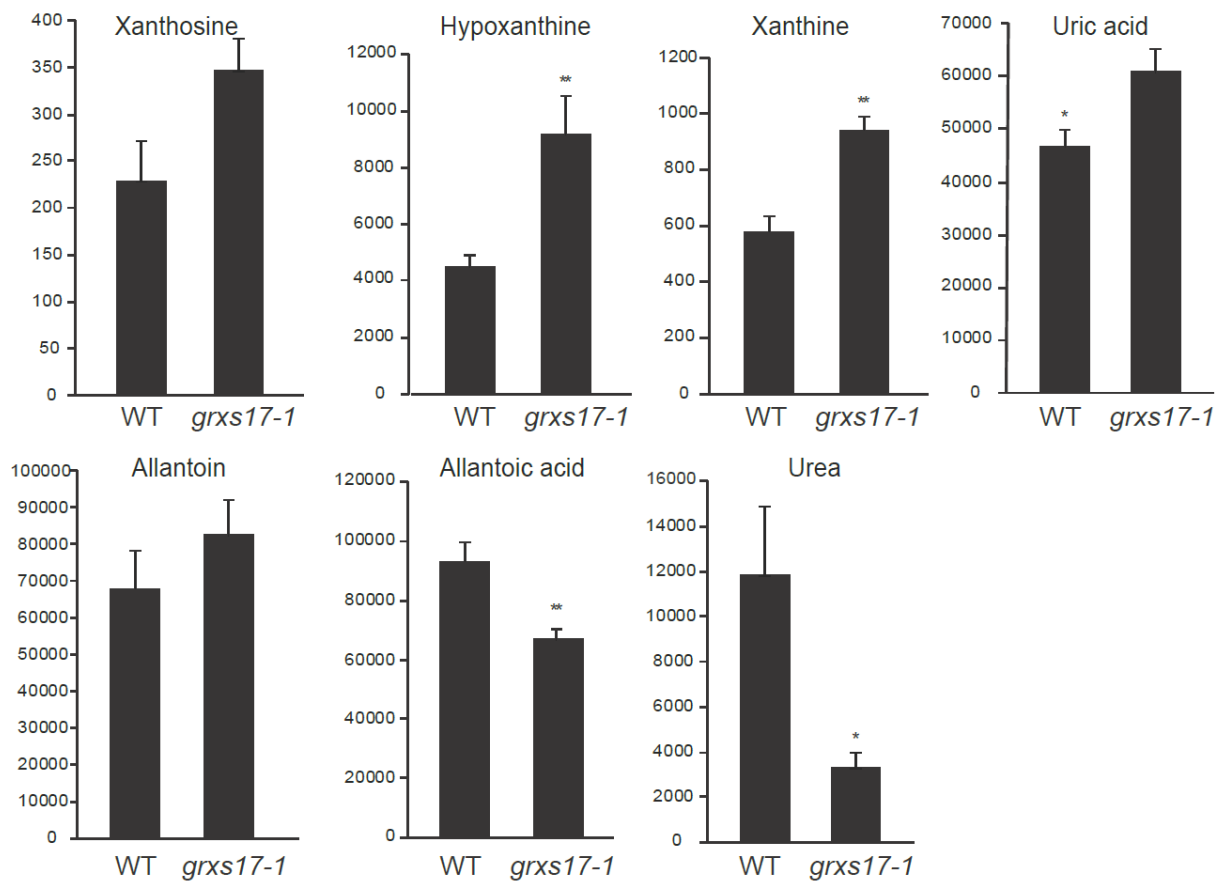

**Figure S3. Analysis of the functioning of the purine salvage pathway in *grxs17-1* seedlings.** Quantification of purine degradation intermediates in 10-day-old seedlings grown on MS media supplemented with 1% sucrose. The y-axes correspond to the relative peak areas representing specific mass fragment ion peaks (described in Supplemental Table S2) that were normalized by fresh weight and peak area of the internal standard. Bars represent means  $\pm$ SE of  $n=5$  (\*,  $P<0.05$ ; \*\*,  $P<0.01$ ; Student's t-test).
