# Supplementary material
Source: PubMed Central journal article supplement (PMC5047072)
Supplement: supp_pp.16.00261_PP2016-00261R2_Supplemental_Figure_S5.pdf [file supp_pp.16.00261_PP2016-00261R2_Supplemental_Figure_S5.pdf]

A

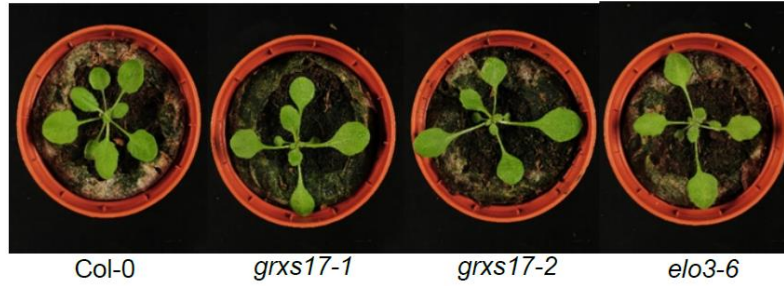

B

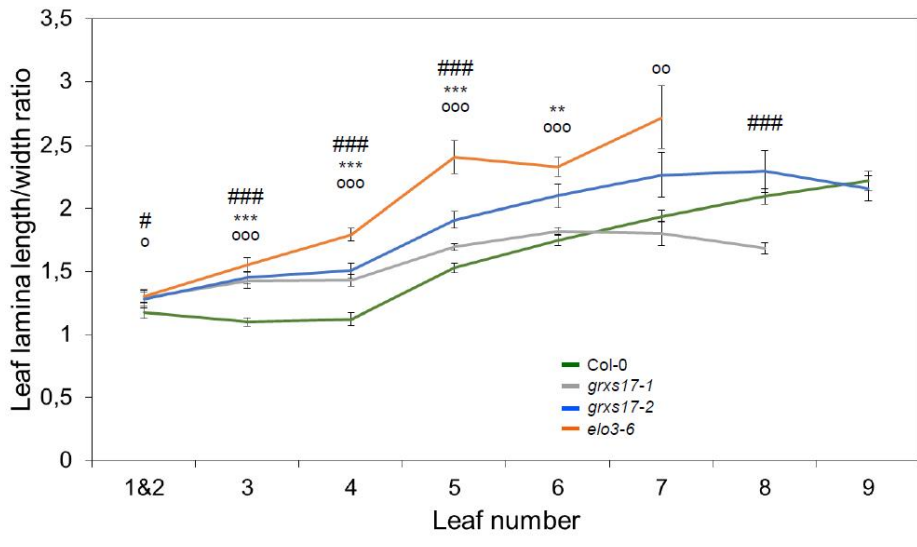

C

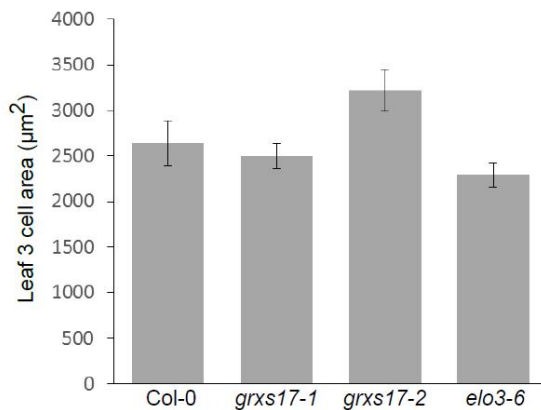

D

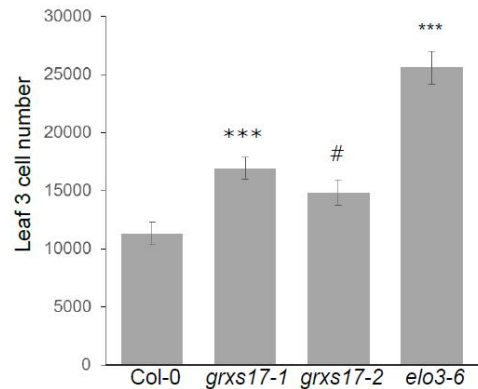

**Figure S5. *grxs17* and *elo3-6* mutants have similar developmental defects.** A, Representative plant phenotypes, 19 days after germination (DAG) of left to right: Col-0, *grxs17-1*, *grxs17-2* and *elo3-6*. B, Ratio between leaf lamina length and width of leaf series of plants, 24 DAG, grown in soil ( $n \geq 10$ ) (\*,  $P < 0.05$ ; \*\*,  $P < 0.01$ ; \*\*\*,  $P < 0.001$ , Student's t-test, # comparison between Col-0 and *grxs17-1*; \* for Col-0 and *grxs17-2* and ° for Col-0 and *elo3-6*. C and D, Cellular analysis of leaf 3 ( $n = 5$ ): mean of cell area (C) and calculated number of cells (D) (\*\*\*,  $P < 0.001$ ; #,  $P = 0.06$ , Student's t-test). Bars represent SE.
