# Supplementary material
Source: PubMed Central journal article supplement (PMC5047072)
Supplement: supp_pp.16.00261_PP2016-00261R2_Supplemental_Figure_S6.pdf [file supp_pp.16.00261_PP2016-00261R2_Supplemental_Figure_S6.pdf]

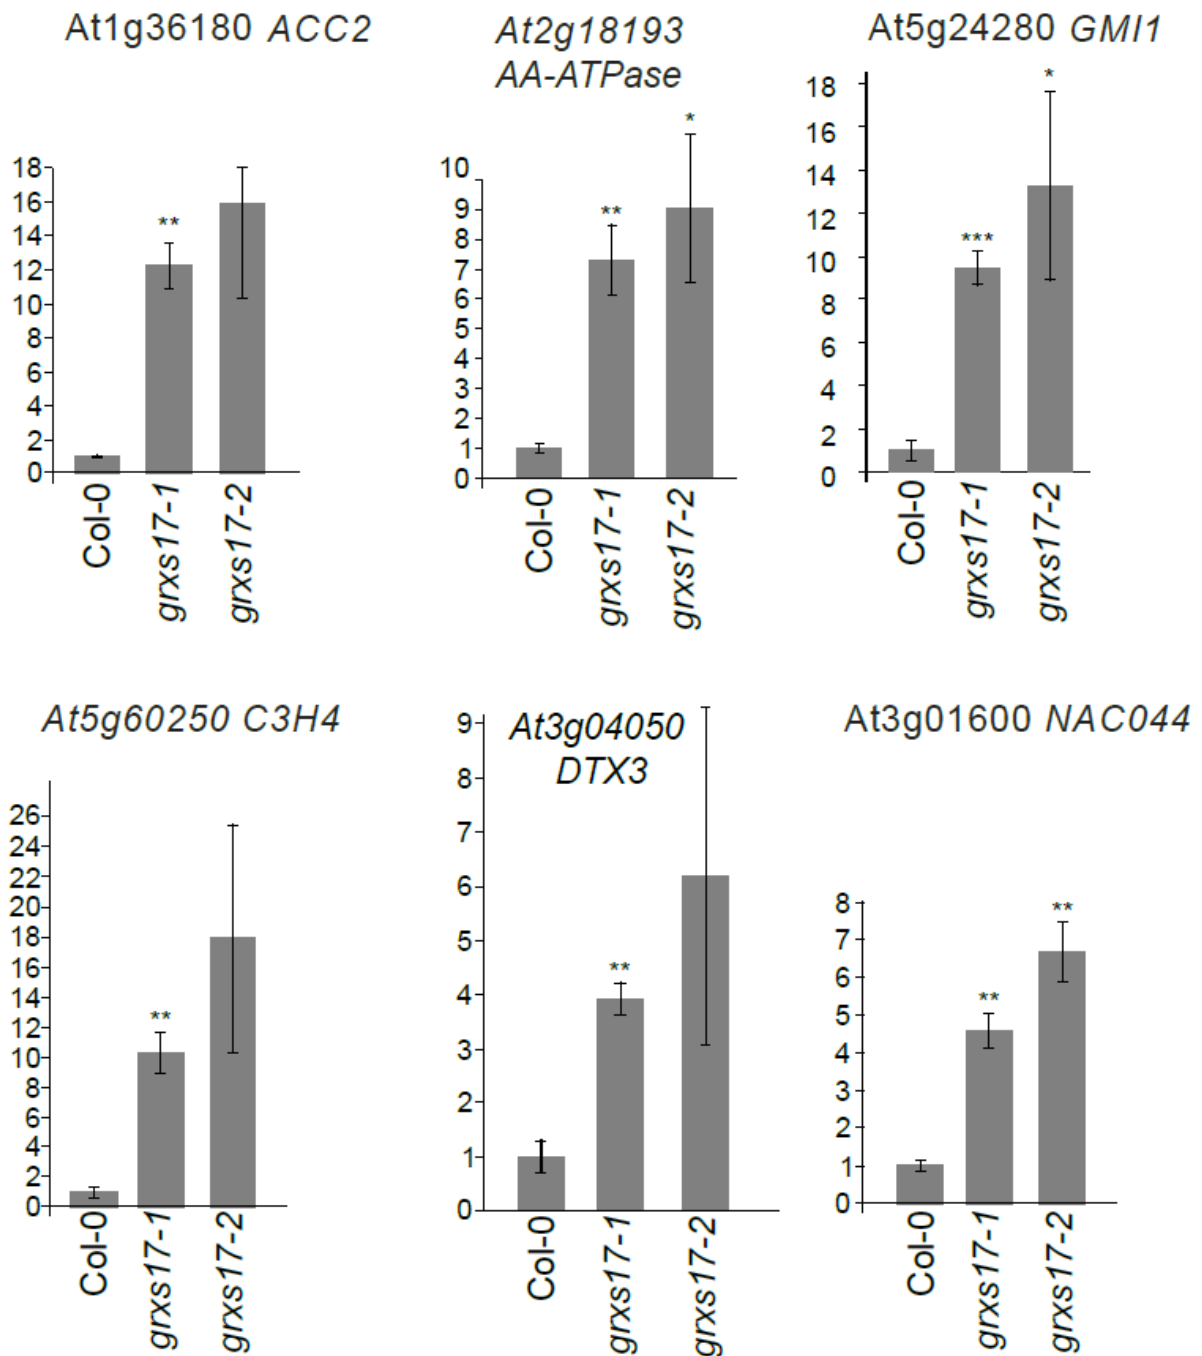

**Figure S6. *grxs17* and *elo3-6* mutants show similar molecular defects.** qPCR validation of gene expression in *grxs17-1* and *grxs17-2*. The expression ratio relative to that in wild-type Col-0 seedlings is plotted (set at 1). Bars represent means  $\pm$ SE of n=3 (\*, P<0.05; \*\*, P<0.01; \*\*\*, P<0.001, Student's t-test).
