# Supplementary material
Source: PubMed Central journal article supplement (PMC5047072)
Supplement: supp_pp.16.00261_PP2016-00261R2_Supplemental_Table_S2.pdf [file supp_pp.16.00261_PP2016-00261R2_Supplemental_Table_S2.pdf]

1 **Table S2. Identification and annotation of detected purine metabolite peaks.**

2

| <b>Reporting metabolite data was presented according to the recommendation by Fernie et al., 2011</b> |                             |                                                                            |                                                                                                                                                  |
|-------------------------------------------------------------------------------------------------------|-----------------------------|----------------------------------------------------------------------------|--------------------------------------------------------------------------------------------------------------------------------------------------|
| <b>Level</b>                                                                                          | <b>Aspect</b>               | <b>Information</b>                                                         | <b>Fill in</b>                                                                                                                                   |
| general aspect                                                                                        | Type of metabolome analysis | targeted metabolite analysis                                               | TRUE                                                                                                                                             |
|                                                                                                       |                             | non-targeted metabolite class scale profiling                              | FALSE                                                                                                                                            |
|                                                                                                       |                             | non-targeted metabolome scale profiling                                    | FALSE                                                                                                                                            |
|                                                                                                       |                             | non-targeted finger printing of mass features                              | FALSE                                                                                                                                            |
|                                                                                                       | Type of quantification      | absolute or quantification                                                 | Relative quantification                                                                                                                          |
|                                                                                                       | Type of reference samples   | chemically defined                                                         | standard reference compounds acquired in chemical companies                                                                                      |
|                                                                                                       |                             | biologically defined                                                       | -                                                                                                                                                |
|                                                                                                       | Type of replication         | analytical (same analytical sample preparation)                            | 1                                                                                                                                                |
|                                                                                                       |                             | technological (same biological preparation)                                | 1                                                                                                                                                |
|                                                                                                       |                             | biological (same experimental condition)                                   | 5                                                                                                                                                |
|                                                                                                       |                             | full experiment                                                            | 10                                                                                                                                               |
|                                                                                                       | Type of technology          | reference publication                                                      | Lisec et al (2006)                                                                                                                               |
|                                                                                                       | Sample preparation          |                                                                            | chemical derivatized                                                                                                                             |
|                                                                                                       |                             | method of chromatography/separation                                        | Lisec et al (2006)                                                                                                                               |
|                                                                                                       |                             | method of ionization                                                       | - 70 MeV hard ionization                                                                                                                         |
|                                                                                                       |                             | method of detection                                                        | electron impact ionization                                                                                                                       |
| metabolite/mass feature                                                                               | Metabolite                  | metabolite name                                                            | see below                                                                                                                                        |
|                                                                                                       |                             | metabolite sum formula                                                     | see below                                                                                                                                        |
|                                                                                                       |                             | metabolite structure and public source of metabolite identifier            | Metabolites were identified in comparison to database entries of authentic standards (Kopka <i>et al.</i> , 2005; Schauer <i>et al.</i> , 2005). |
|                                                                                                       | Identification              | identification process                                                     | manually supervised with Xculibar                                                                                                                |
|                                                                                                       |                             | by authentic mass isotopomer added to one or all biological sample(s)      | FALSE                                                                                                                                            |
|                                                                                                       |                             | by authentic reference compound within a co-processed reference mixture    | FALSE                                                                                                                                            |
|                                                                                                       |                             | by authentic reference compound previously mapped to the analytical system | TRUE                                                                                                                                             |
|                                                                                                       |                             | reference library                                                          | Metabolites were identified in comparison to spectrum of authentic standards analyzed with samples.                                              |

|                                                                                                      |                                |                                                                          |                                                                                |
|------------------------------------------------------------------------------------------------------|--------------------------------|--------------------------------------------------------------------------|--------------------------------------------------------------------------------|
|                                                                                                      |                                | type of mass spectrum                                                    |                                                                                |
|                                                                                                      |                                | by match of molecular mass (single mass fragment)                        | YES                                                                            |
|                                                                                                      |                                | by match of fragments                                                    | YES                                                                            |
|                                                                                                      |                                | by match of fragmentation pattern                                        | YES                                                                            |
|                                                                                                      |                                | type of retention index                                                  | min/sec                                                                        |
|                                                                                                      |                                | by match of retention time (index) to reference library                  | FALSE                                                                          |
|                                                                                                      | Quantification                 | type of quantification                                                   | relative peak area quantification by internal standard and sample fresh weight |
|                                                                                                      | Validity testing               | Recovery testing (chemical analog)                                       | not performed                                                                  |
|                                                                                                      |                                | Recovery testing (internally added mass isotopomer)                      | not performed                                                                  |
|                                                                                                      |                                | Recovery testing (mixture of most divergent samples from the experiment) | not performed                                                                  |
|                                                                                                      |                                | Test for linear range                                                    | not performed                                                                  |
|                                                                                                      |                                | Limit of quantification (LOQ)                                            | not performed                                                                  |
|                                                                                                      |                                | Limit of detection (LOD)                                                 | not performed                                                                  |
|                                                                                                      |                                |                                                                          |                                                                                |
|                                                                                                      | <b>Experiment title:</b>       | Metabolite profiles of Arabidopsis thaliana seedling, grxs mutant line   |                                                                                |
|                                                                                                      | <b>Organism/Plant species:</b> | <i>Arabidopsis thaliana</i>                                              |                                                                                |
|                                                                                                      | <b>Organ/tissue:</b>           | seedling                                                                 |                                                                                |
|                                                                                                      | <b>Analytical tool:</b>        | GC/TOF-MS                                                                |                                                                                |
|                                                                                                      |                                |                                                                          |                                                                                |
| Peak/compound no.- number of compound found                                                          |                                |                                                                          |                                                                                |
| Ret . Time- Time expected, Tag Time Index and Time deviation                                         |                                |                                                                          |                                                                                |
| Putative Name- putative identification of the metabolite/derivative                                  |                                |                                                                          |                                                                                |
| Corresponding metabolite name in literature                                                          |                                |                                                                          |                                                                                |
| Mol. Formula- molecular formula of the metabolite or its FA adduct;                                  |                                |                                                                          |                                                                                |
| Mass to charge ratio (m/z)                                                                           |                                |                                                                          |                                                                                |
| (S)- identification confirmed by a standard compound                                                 |                                |                                                                          |                                                                                |
| I, II, III- different isomers                                                                        |                                |                                                                          |                                                                                |
| Identification level (A; B; C; D)- (A) standard or NMR; (B) MS/MS; (C) MS <sup>E</sup> ; (D) MS only |                                |                                                                          |                                                                                |
|                                                                                                      |                                |                                                                          |                                                                                |

| <b>Experiment title:</b>                                                                             | Metabolite changes in <i>grxs17</i> mutants |                          |             |                     |                            |                            |
|------------------------------------------------------------------------------------------------------|---------------------------------------------|--------------------------|-------------|---------------------|----------------------------|----------------------------|
| <b>Organism/Plant species:</b>                                                                       | <i>Arabidopsis thaliana</i>                 |                          |             |                     |                            |                            |
| <b>Organ/tissue:</b>                                                                                 | seedlings                                   |                          |             |                     |                            |                            |
| <b>Analytical tool:</b>                                                                              | GC-TOF-MS                                   |                          |             |                     |                            |                            |
| Peak/compound no. - number referenced back to the main text                                          |                                             |                          |             |                     |                            |                            |
| Ret. Time- Time expected, Tag Time Index and Time deviation                                          |                                             |                          |             |                     |                            |                            |
| Putative Name- putative identification of the metabolite/derivative                                  |                                             |                          |             |                     |                            |                            |
| Corresponding metabolite name in literature                                                          |                                             |                          |             |                     |                            |                            |
| Mol. Formula- molecular formula of the metabolite or its FA adduct;                                  |                                             |                          |             |                     |                            |                            |
| Mass to charge ratio (m/z)                                                                           |                                             |                          |             |                     |                            |                            |
| (S)- identification confirmed by a standard compound                                                 |                                             |                          |             |                     |                            |                            |
| I, II, III- different isomers                                                                        |                                             |                          |             |                     |                            |                            |
| Identification level (A; B; C; D)- (A) standard or NMR; (B) MS/MS; (C) MS <sup>E</sup> ; (D) MS only |                                             |                          |             |                     |                            |                            |
| Peak/Compound no.                                                                                    | Time Expected (min)                         | Putative metabolite name | Mol formula | g mol <sup>-1</sup> | Mass to charge ratio (m/z) | Identification level (A-D) |
| Peak no. 1                                                                                           | 3,83                                        | Urea                     | CH4N2O      | 60,06               | 261                        | A                          |
| Peak no. 2                                                                                           | 5,49                                        | Allantoic acid           | C4H8N4O4    | 176,13              | 189                        | A                          |
| Peak no. 3                                                                                           | 9,9                                         | Allantoin                | C4H6N4O3    | 158,12              | 188                        | A                          |
| Peak no. 4                                                                                           | 10,68                                       | Hypoxanthine             | C5H4N4O     | 136,11              | 192                        | A                          |
| Peak no. 5                                                                                           | 12,01                                       | Uric acid                | C5H4N4O3    | 168,11              | 441                        | A                          |
| Peak no. 6                                                                                           | 12,05                                       | Xanthine                 | C5H4N4O2    | 152,11              | 353                        | A                          |
| Peak no. 7                                                                                           | 15,09                                       | Xanthosine               | C10H12N4O6  | 284,23              | 245                        | A                          |
