# Supplementary material
Source: PubMed Central journal article supplement (PMC5047072)
Supplement: supp_pp.16.00261_PP2016-00261R2_Supplemental_Table_S3.pdf [file supp_pp.16.00261_PP2016-00261R2_Supplemental_Table_S3.pdf]

1 **Table S3. Primers used in this study.**

|    |                                                              |                                                             |
|----|--------------------------------------------------------------|-------------------------------------------------------------|
| 2  | For cloning                                                  |                                                             |
| 3  | attB1-GRXS17                                                 | 5' -GGGGACAAGTTTGTACAAAAAAGCAGGCTCCATGAGCGGTACGGTGAAG-3'    |
| 4  | attB2-GRXS17                                                 | 5' -GGGGACCACTTTGTACAAGAAAGCTGGGTCTCMCTCGGATAGAGTTGCTTTG-3' |
| 5  | attB1-AtDRE2                                                 | 5' -GGGGACAAGTTTGTACAAAAAAGCAGGCTCCATGGATTTCGATGATGAATCA-3' |
| 6  | attB2-AtDRE2                                                 | 5' -GGGGACCACTTTGTACAAGAAAGCTGGGTCTCMTATGTCAGCTTCAAGGAA-3'  |
| 7  | attB1 AtXDH1                                                 | 5' -GGGGACAAGTTTGTACAAAAAAGCAGGCTCCATGGGTTCACTGAAAAAGG-3'   |
| 8  | attB2 AtXDH1                                                 | 5' -                                                        |
| 9  | GGGGACCACTTTGTACAAGAAAGCTGGGTCTCMAACACTAAGATTAGGGTAGAAATC-3' |                                                             |
| 10 | attB1-CTU1                                                   | 5' -GGGGACAAGTTTGTACAAAAAAGCAGGCTCCATGGAGGCCAAGAAC-3'       |
| 11 | attB2-CTU1                                                   | 5' -GGGGACCACTTTGTACAAGAAAGCTGGGTCTCMGAAATCCAGAGATCC-3'     |
| 12 | attB1-CTU2                                                   | 5' -GGGGACAAGTTTGTACAAAAAAGCAGGCTCCATGGCTTGTAATTCCTC-3'     |
| 13 | attB2-CTU2                                                   | 5' -GGGGACCACTTTGTACAAGAAAGCTGGGTCTCMGACAACCTCTTCATC-3'     |
| 14 | For genotyping                                               |                                                             |
| 15 | SALK_021301 grxs17-1-F                                       | 5' -CTTTCGCATTCTCCTTCACAG-3'                                |
| 16 | SALK_021301 grxs17-1-R                                       | 5' -CCTTCTCCCTCTTCGAAGATG-3'                                |
| 17 | LB SALK T-DNA primer                                         | 5' -ATTTTGCCGATTTTCGGAAC-3'                                 |
| 18 | GK_709D04 rol5-2-F                                           | 5' -TCGTCGGAGTTGGATCAATAG-3'                                |
| 19 | GK_709D04 rol5-2-R                                           | 5' -TGGAGAAGTAATCCAGCTTCTTG-3'                              |
| 20 | GK_686B10 ctu2-2-F                                           | 5' -CTTCGACGATGGAAGATTCTG-3'                                |
| 21 | GK_686B10 ctu2-2-R                                           | 5' -TCGAAGTGAAGTACAATGGG-3'                                 |
| 22 | GK-555H06 elo3-6-F                                           | 5' -ACCGTAAATCAGCATTGTGTCG-3'                               |
| 23 | GK-555H06 elo3-6-R                                           | 5' -TGGGGTTTAGGTAGTTTGGG-3'                                 |
| 24 | GK T-DNA primer (LB)                                         | 5' -CCCATTTGGACGTGAATGTAGACA-3' C                           |
| 25 | For qRT-PCR                                                  |                                                             |
| 26 | GRXS17-F                                                     | 5' -CGCCAAGGCCTTAAAGTGTA-3'                                 |
| 27 | GRXS17-R                                                     | 5' -CATAAGCTCGCCTTTCACG-3'                                  |
| 28 | PARP2-F                                                      | 5' -ATGGCGTTCTGCTCCTCTGC-3'                                 |
| 29 | PARP2-R                                                      | 5' -GGTGCTGTTTTCCCCACACC-3'                                 |
| 30 | AT1G36180 ACC2-F                                             | 5' -CATGGAGTGGTCCCATGTT-3'                                  |
| 31 | AT1G36180 ACC2-R                                             | 5' -CCTCGGGGACAGTTACCA-3'                                   |
| 32 | AT2G18193-F                                                  | 5' -TCACCCTCAAACCTTCCTG-3'                                  |
| 33 | AT2G18193-R                                                  | 5' -TTCCATATGCCTGCACTGTC-3'                                 |
| 34 | AT5G24280 GMI1-F                                             | 5' -ATACGTCTTGATGACGGTTCTG-3'                               |
| 35 | AT5G24280 GMI1-R                                             | 5' -CGGTGTCAAATCCCACAAGT-3'                                 |
| 36 | AT5G60250 C3H4-F                                             | 5' -TCTTATCCGATTTTCCAATACGTC-3'                             |
| 37 | AT5G60250 C3H4-R                                             | 5' -TGTTGCATGATGCTTTGAAGA-3'                                |
| 38 | AT2G04050 DTX3-F                                             | 5' -CCACAATGGTGAGCTCCAG-3'                                  |
| 39 | AT2G04050 DTX3-R                                             | 5' -CACCCGCTAACCCAAACA-3'                                   |
| 40 | AT3G01600 NAC044-F                                           | 5' -TCACCCTCAAACCTTCCTG-3'                                  |
| 41 | AT3G01600 NAC044-R                                           | 5' -TTCCATATGCCTGCACTGTC-3'                                 |
| 42 |                                                              |                                                             |
